# Supplementary material
Source: ML conference proceedings conference paper supplement (https://proceedings.neurips.cc/paper_files/paper/2022/hash/57c5a7c83b056d74bc97b7db36bd3649-Abstract.html)
Supplement: Supplementary file 1 [file 57c5a7c83b056d74bc97b7db36bd3649-Supplemental-Conference.pdf]

---

# Neural Matching Fields: Implicit Representation of Matching Fields for Visual Correspondence

## - Supplementary Materials -

---

In this document, we provide more implementation details, analysis and psuedo-code of NeMF and more results on SPair-71k [6], PF-PASCAL [3], and PF-WILLOW [2].

### Appendix A. More Implementation Details

**Cost Embedding Network Details.** The cost embedding network is based on CATs [1]. More specifically, instead of utilizing hyperpixels, we use the feature maps of last index at each pyramidal layers of ResNet-101. Then we resize their spatial resolutions to  $16 \times 16$  using 4D convolutions and compute correlation maps. Then we feed them into subsequent Transformer [1] by treating the level dimension as channel, which in this case is 4, and obtain a cost feature volume that has a shape of  $\mathbb{R}^{16 \times 16 \times 16 \times 16 \times 16}$ .

**Training Details.** We use AdamW [4] with learning rate  $3e^{-5}$ . For the MLP architecture, we compose with 3 blocks, which the each block consists of 2 fully connected networks followed by ReLU activation and a residual connection. For uniform sampling, we sample both directions of cost volume and use them to compute the final loss. We use negative log likelihood function with temperature  $\tau = 0.07$  for computing the loss between the predicted correspondence and the ground-truth correspondence. We use EPE loss additionally using the predicted flow and the ground-truth flow from cost embedding network. Balancing factors  $\lambda_f$  and  $\lambda_c$  are set to 1. For the frequency of the positional encoding  $L$  for coordinates, we set as  $L = 10$ . We use PyTorch3D [8] to encode the coordinates.

### Appendix B. Controlling computational complexity

Additionally, we emphasize that with only a negligible amount of influence on the performance, we can reduce computational burden and memory consumption at inference phase by only optimizing the coordinates of interests used for evaluation at coordinate optimization phase and tuning the batch-size of the input coordinates to the PatchMatch-based sampling, which can determine the memory consumption and run-time. Assuming a set of keypoints are for querying is available, we can optimize only the coordinates of the keypoint which we want to find its corresponding keypoint at target image. This way, we can significantly reduce the run-time. The results are shown in Table 1. For this experiment, we assumed NeMF is representing cost volume of size 128 to show the memory comparison that will be presented below this paragraph. From the results, we observe negligible memory change, but significant reduction in run time when only the keypoints of interest are optimized.

Also, by reducing the batch-size of the input coordinates to the PatchMatch-based sampling we can also control the memory consumption. To this end, we conduct a simple experiment and report the run-time and memory consumption with varying batch size. The results are shown in Table 2. This table shows that tuning the batch-size can reduce the memory consumption by sacrificing run-time, meaning that users can choose to infer with high/low memory and fast/slow run-time.

| Inference strategy                    | Run-time<br>[s/img] | Memory<br>[MiB] |
|---------------------------------------|---------------------|-----------------|
| PatchMatch Only                       | 1.42                | 6307            |
| PatchMatch + Optimize all coordinates | 2.21                | 6309            |
| PatchMatch + Optimize only keypoints  | 1.65                | 6308            |

Table 1: **Computation complexity comparison.**

| Batch size | Run-time<br>[s/img] | Memory<br>[MiB] |
|------------|---------------------|-----------------|
| 100000     | 1.65                | 6308            |
| 50000      | 2.27                | 4301            |
| 25000      | 4.43                | 2730            |
| 10000      | 9.18                | 1789            |

Table 2: **Computation complexity comparison.**

## Appendix C. Additional Results

**More Qualitative Results.** We provide more comparison of CATs and other state-of-the-art methods on SPair-71k [6] in Fig. 1, PF-PASCAL [3] in Fig. 2, and PF-WILLOW [3] in Fig. 3. We also present visualization of matching fields on SPair-71k [6] in Fig. 4.

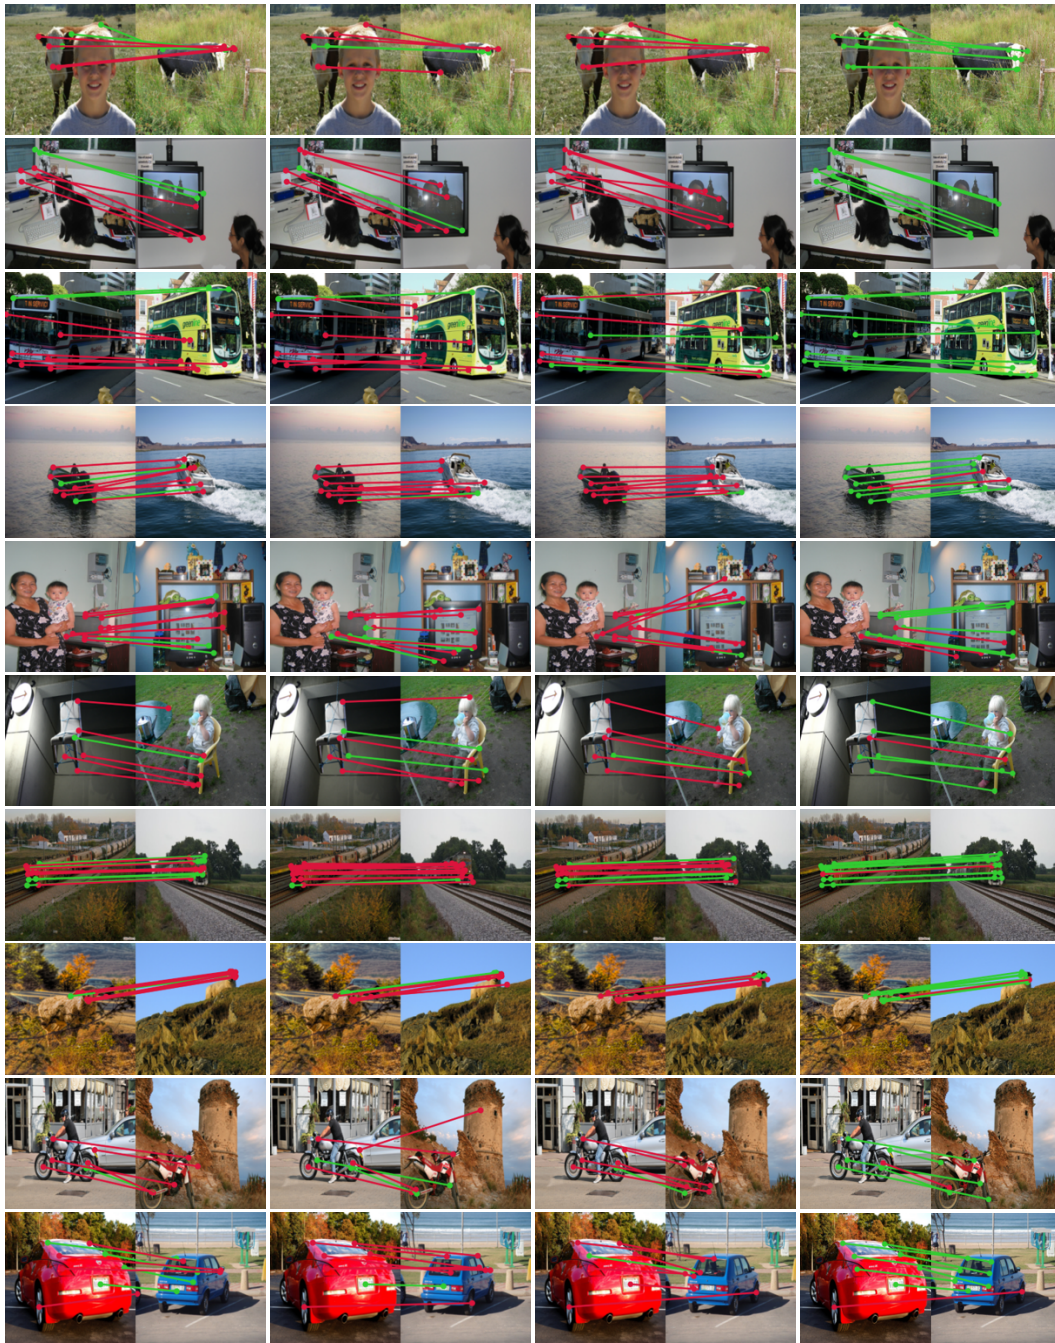

(a) CHM [5]

(b) DHPF [7]

(c) CATs [1]

(d) NeMF

Figure 1: **Qualitative results on SPair-71k [6]:** keypoints transfer results by (a) CHM [5], (b) HPF [7], and (c) CATs [1], and (d) NeMF. Note that green and red line denotes correct and wrong prediction, with respect to the ground-truth.

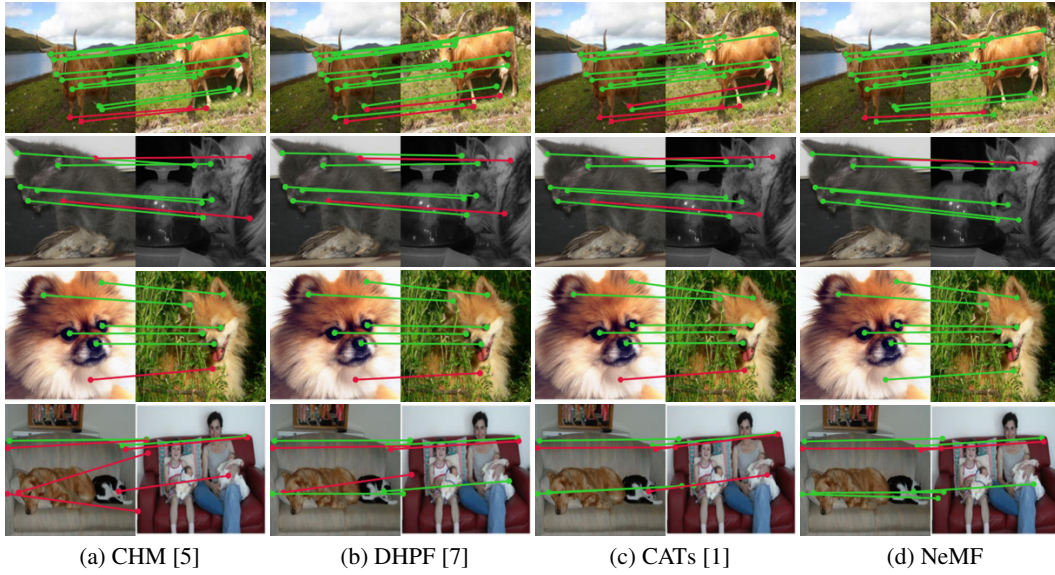

Figure 2: **Qualitative results on PF-PASCAL [3]**

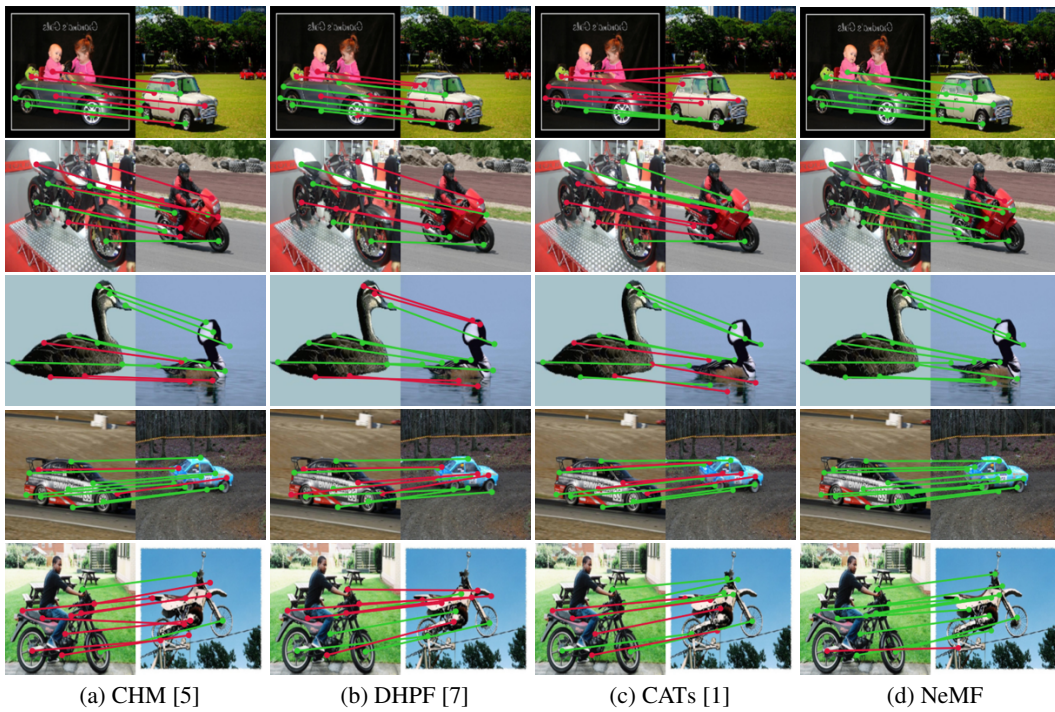

Figure 3: **Qualitative results on PF-WILLOW [2]**

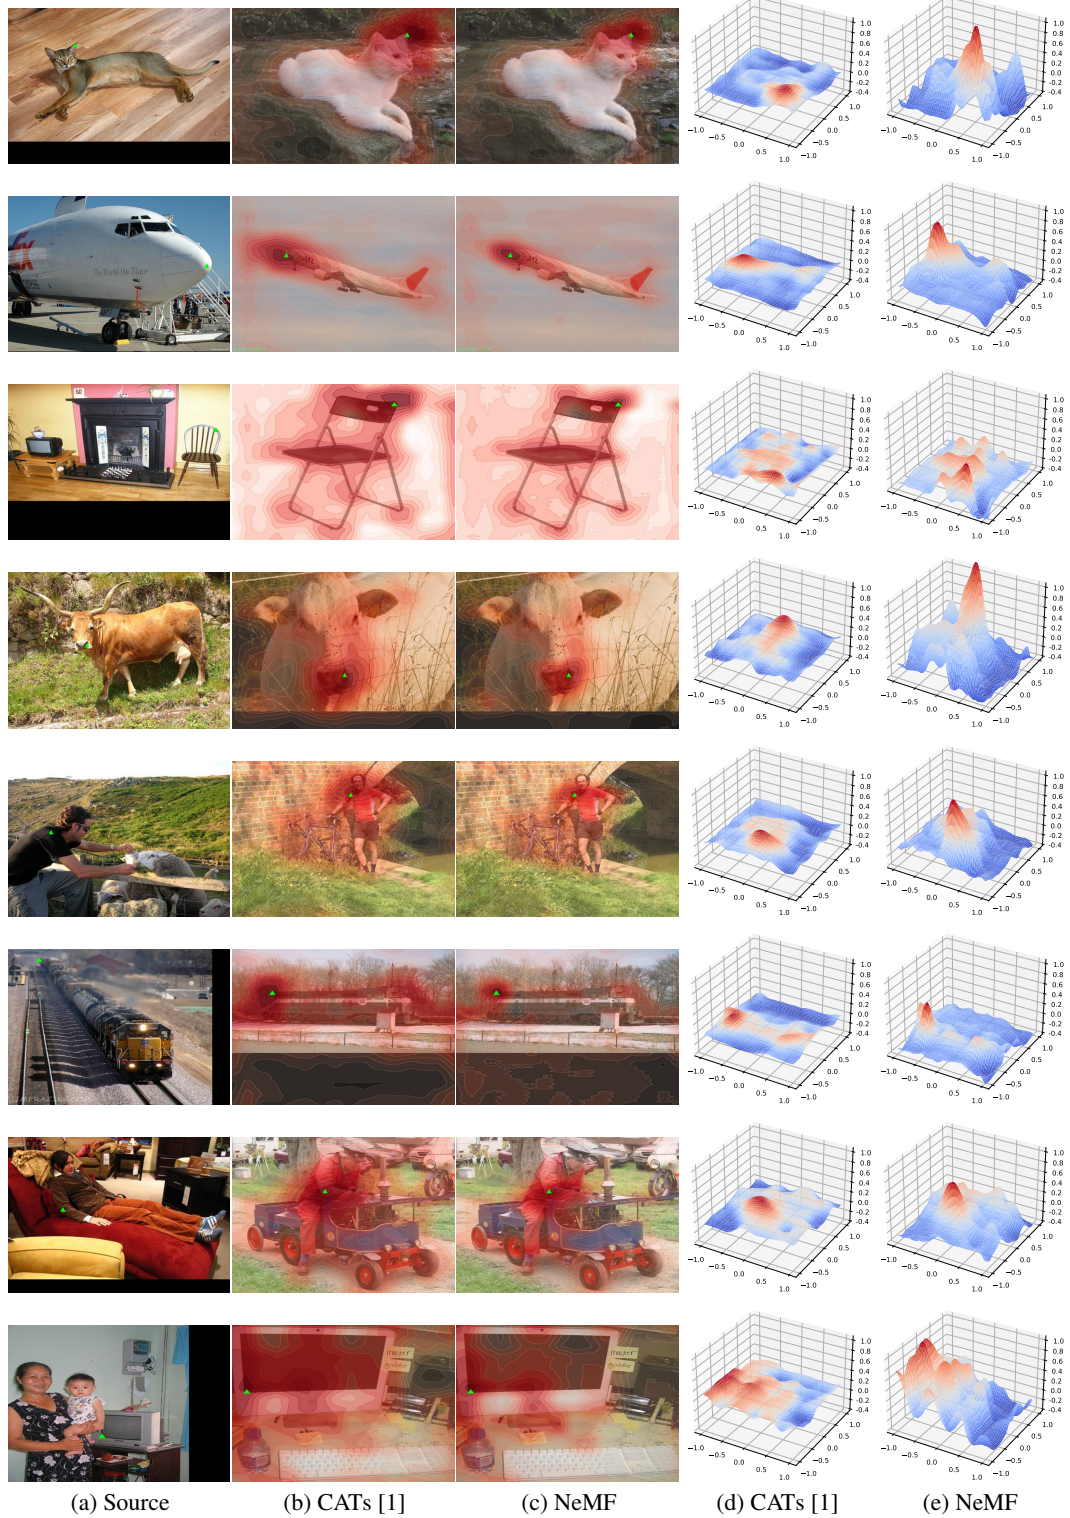

Figure 4: **Visualization of matching fields on SPair-71k [6]:** (a) source image, where the keypoint is marked as green triangle, (b), (c) 2D contour plots of cost by CATs [1] and the NeMF (ours), respectively, and (d), (e) 3D visualization of cost by CATs [1] and NeMF, with respect to the keypoint in (a). Note that all the visualizations are smoothed by a Gaussian kernel.

## References

- [1] Seokju Cho, Sunghwan Hong, Sangryul Jeon, Yunsung Lee, Kwanghoon Sohn, and Seungryong Kim. Cats: Cost aggregation transformers for visual correspondence. In *Thirty-Fifth Conference on Neural Information Processing Systems*, 2021.
- [2] Bumsub Ham, Minsu Cho, Cordelia Schmid, and Jean Ponce. Proposal flow. In *CVPR*, 2016.
- [3] Bumsub Ham, Minsu Cho, Cordelia Schmid, and Jean Ponce. Proposal flow: Semantic correspondences from object proposals. *IEEE transactions on pattern analysis and machine intelligence*, 2017.
- [4] Ilya Loshchilov and Frank Hutter. Decoupled weight decay regularization. *arXiv preprint arXiv:1711.05101*, 2017.
- [5] Juhong Min, Seungwook Kim, and Minsu Cho. Convolutional hough matching networks for robust and efficient visual correspondence. *arXiv preprint arXiv:2109.05221*, 2021.
- [6] Juhong Min, Jongmin Lee, Jean Ponce, and Minsu Cho. Spair-71k: A large-scale benchmark for semantic correspondence. *arXiv preprint arXiv:1908.10543*, 2019.
- [7] Juhong Min, Jongmin Lee, Jean Ponce, and Minsu Cho. Learning to compose hypercolumns for visual correspondence. In *Computer Vision—ECCV 2020: 16th European Conference, Glasgow, UK, August 23–28, 2020, Proceedings, Part XV 16*. Springer, 2020.
- [8] Nikhila Ravi, Jeremy Reizenstein, David Novotny, Taylor Gordon, Wan-Yen Lo, Justin Johnson, and Georgia Gkioxari. Accelerating 3d deep learning with pytorch3d. *arXiv:2007.08501*, 2020.
